# Supplementary material for: Effects of Notch signaling on the lineage commitment of human peripheral blood monocyte trilineage progenitor under inflammatory conditions
Source: Research Square preprint supplement (doi:10.21203/rs.3.rs-6843542/v1), 2025-06-11
Supplement: Supplementary file 1 [file 2baf65e43d018b067e5cd972.docx]

**Table 1.** Monoclonal antibodies used for cell sorting, phenotyping, and *in vitro* treatment

| **Target** | **Clone** | **Conjugate** | **Manufacturer** |
| --- | --- | --- | --- |
| CD45 | HI30 | BV510 | BioLegend (San Diego, CA, SAD) |
| CD15 | W6D3 | BV421 | BioLegend (San Diego, CA, SAD) |
| CD3 | OKT3 | FITC | BioLegend (San Diego, CA, SAD) |
| CD19 | SJ25C1 | FITC | BioLegend (San Diego, CA, SAD) |
| CD56 | QA17A16 | FITC | BioLegend (San Diego, CA, SAD) |
| CD14 | HDC14 | PerCP-Cy5.5 | BioLegend (San Diego, CA, SAD) |
| CD16 | B73.1 | PE/Cy7 | BioLegend (San Diego, CA, SAD) |
| CD11b | ICRF44 | APC-Cy7 | BioLegend (San Diego, CA, SAD) |
| CD11b | M1/70 | BV421 | BioLegend (San Diego, CA, SAD) |
| CD1a | HI149 | APC | BioLegend (San Diego, CA, SAD) |
| CD1c | L161 | APC-Fire750 | BioLegend (San Diego, CA, SAD) |
| CD209 | 9E9A8 | PE/Dazzle594 | BioLegend (San Diego, CA, SAD) |
| HLA-DR | L234 | BV510 | BioLegend (San Diego, CA, SAD) |
| CD40 | 5C3 | PE | BioLegend (San Diego, CA, SAD) |
| CD163 | GHI/61 | BV421 | BioLegend (San Diego, CA, SAD) |
| RANK | 80704 | PE | R&D Systems (BioTechne, Abingdon, UK) |
| CD51/61 | 23C6 | FITC | eBioscience (San Diego, CA, SAD) |
| CD115 | 12-3A3-1B10 | Biotinylated | eBioscience (San Diego, CA, SAD) |
| CD206 | 15-2 | PE/Dazzle594 | BioLegend (San Diego, CA, SAD) |
| CD28 | 28.2 | purified | BioLegend (San Diego, CA, SAD) |
| CD49d | 9F10 | purified | BioLegend (San Diego, CA, SAD) |
| CD8a | RPA-T8 | PerCP-Cy5.5 | BioLegend (San Diego, CA, SAD) |
| CD4 | OKT4 | PE/Cy7 | BioLegend (San Diego, CA, SAD) |
| IFN-γ | B27 | APC | BioLegend (San Diego, CA, SAD) |
| IL-2 | MQ1-17H12 | PE/Cy7 | BioLegend (San Diego, CA, SAD) |
| TNF-α | Mab11 | PE | BioLegend (San Diego, CA, SAD) |
